# Supplementary material for: Extraction of Pectin from Passion Fruit Peel: Composition, Structural Characterization and Emulsion Stability
Source: MDPI journal article supplement (doi:10.3390/foods11243995), 2022-12-09
Supplement: s1 [file s1]

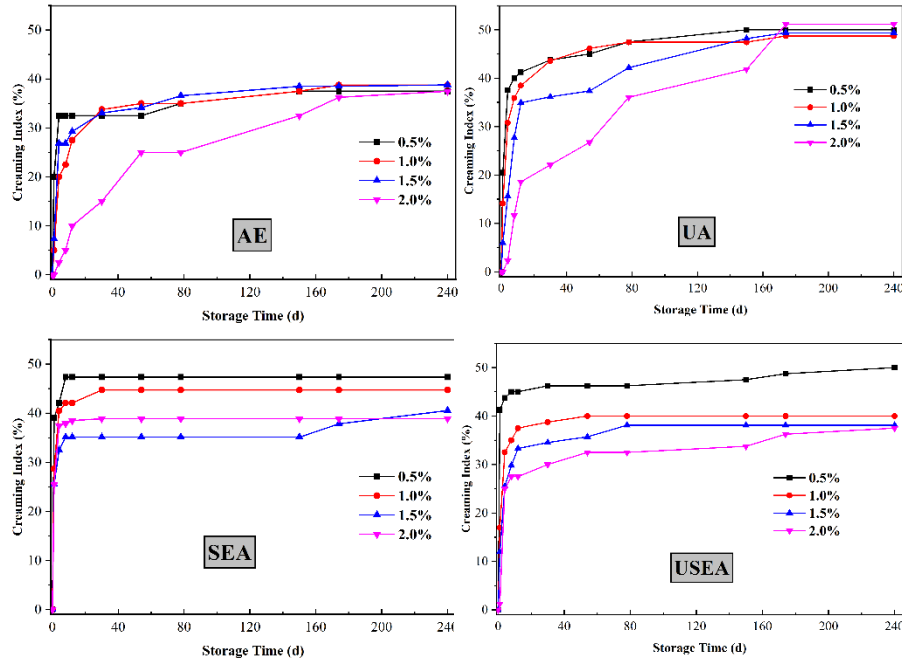

**Figure S1** The creaming index of pectin emulsions for 10 days at room temperature.

The calculation of creaming index using the following formula:

$$\text{Creaming index (\%)} = \frac{H_s}{H_e}$$

where  $H_s$  is the height of the serum layer below the cream layer and  $H_e$  is the total height of the emulsion.
